# Supplementary material
Source: PubMed Central journal article supplement (PMC524820)

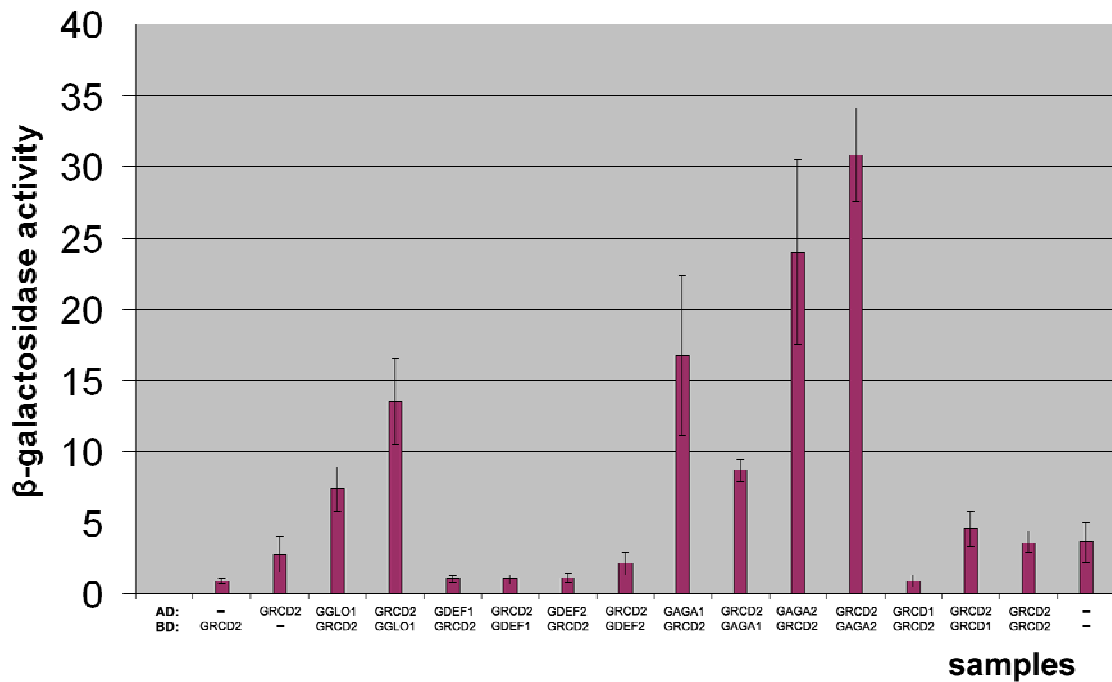

Supplement: pnas_101_44_15817__1.pdf [file pnas_101_44_15817__1.pdf]
